# Supplementary material for: Sensitizing the phosphorescence of pyromellitic diimide through non-covalent halogen–carbonyl interactions
Source: Royal Society of Chemistry journal article supplement (doi:10.1039/d4ce00812j), 2024-01-01
Supplement: d4ce00812j1.pdf [file d4ce00812j1.pdf]

## Supporting information

### **Sensitizing the phosphorescence of pyromellitic diimide through non-covalent halogen-carbonyl interactions**

Debranjana Hati, Swadhin Garain, Shagufi Naz Ansari <sup>#</sup>, Anju Ajayan Kongasseri and Subi J. George <sup>\*</sup>

New Chemistry Unit and School of Advanced Materials (SAMat), Jawaharlal Nehru Centre for Advanced Scientific Research (JNCASR) Jakkur, Bangalore 560064, India.

<sup>#</sup>Present address: Department of Chemistry, School of Engineering, Presidency University Bangalore, 560064, India.

## Table of Contents

1. General Methods
2. Synthetic Schemes and Procedures
3. Experimental Procedures
4. Supporting Figures
5. Supporting Characterization Original data
6. References

### General Methods:

**Spectroscopic Measurements:** The excitation and emission spectra were recorded on FLS1000 spectrometer, Edinburgh Instruments.

**Lifetime and quantum yield measurements:** Phosphorescence lifetime ( $\lambda_{\text{exc.}} = 340 \text{ nm}$ ), gated emission, and time-resolved emission were measured on FLS1000 spectrometer, Edinburgh Instruments equipped with a micro flash-lamp ( $\mu\text{F2}$ ) set-up. Quantum yields were measured using an integrating sphere in the same instrument. Fluorescence lifetimes were performed on a Horiba Delta Flex time-correlated single-photon-counting (TCSPC) instrument with a 375 nm laser diode as the light source. The instrument response function (IRF) was collected by using a scatterer (Ludox AS40 colloidal silica, Sigma-Aldrich).

**Single Crystal X-ray Crystallography:** Suitable single cocrystal of the **PmDI-TBB** and **PmDI-HBB** was mounted on a thin glass fibre with commercially available super glue. Intensity data were collected in Bruker D8 VENTURE diffractometer equipped with a PHOTON detector and graphite-monochromated Mo-K $\alpha$  radiation ( $\lambda = 0.71073 \text{ \AA}$ , 50 kV, 1mA) at 100 K. APEX III software was used to collect, reduce and integrate the raw data. The direct method was used for solving crystal structure, followed by fullmatrix least-squares refinements against F2 (all data HKLF 4 format) using the SHELXL 2014/7 and difference Fourier synthesis and least-squares refinement revealed the positions of the non-hydrogen atoms. All non-hydrogen atoms were refined anisotropically and remaining hydrogen atoms were placed in geometrically constrained positions and refined with isotropic temperature factors,

generally  $1.2 \times U_{eq}$  of their parent atoms. Molecular structure drawings were prepared using the program Mercury (version 3.1).

There are some B-Alerts in PMDI-TBB upon cif-file check which are generated because the structure has some amount of disorder. C11 and C12 carbon atoms of the butyl chain are modelled isotropically as their contribution to the scattering is affected by the disorder. Dynamically disordered chains (that are tethered to a relatively rigid backbone) may exhibit unusual ratios for NonSolvent Resd 1 C Ueq(max)/Ueq(min) Range.

### Synthetic Scheme and Procedure:

Pyromellitic dianhydride (PMDA) was purchased from Sigma Aldrich; 1,2,4,5-Tetrabromobenzene and Hexabromobenzene were purchased from TCI, Acetic acid was purchased from Spectrochem and used without further purification.

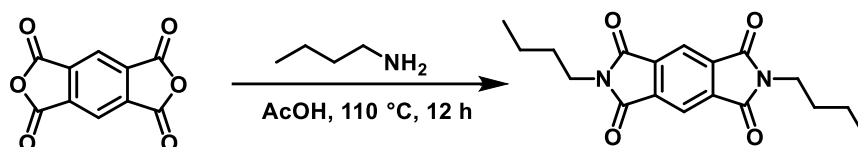

**Synthetic procedure of PmDI:** Compound was synthesized according to the literature procedure.<sup>51</sup>

### Experimental Procedures:

**Protocol for co-crystal synthesis:** 0.05 M solution of both donor and acceptor in a 1:1 molar ratio in DMF was prepared. Then the mixture was heated at 70 °C until it gets fully dissolved and then kept at room temperature for cocrystallization.

**Protocol for sample preparation:** The phosphorescence studies of the cocrystal were done by taking a small amount of the cocrystal between two quartz plates. Solution phase studies were done by taking compounds ( $[c] = 10^{-5}$  M) in THF. For neat film studies, donor-acceptor 1:1 mixture in DMF was taken and then drop-casted on a clean quartz substrate. The drop-casted films were dried in vacuum oven at 60 °C until the DMF was completely removed.

### Supporting Figures:

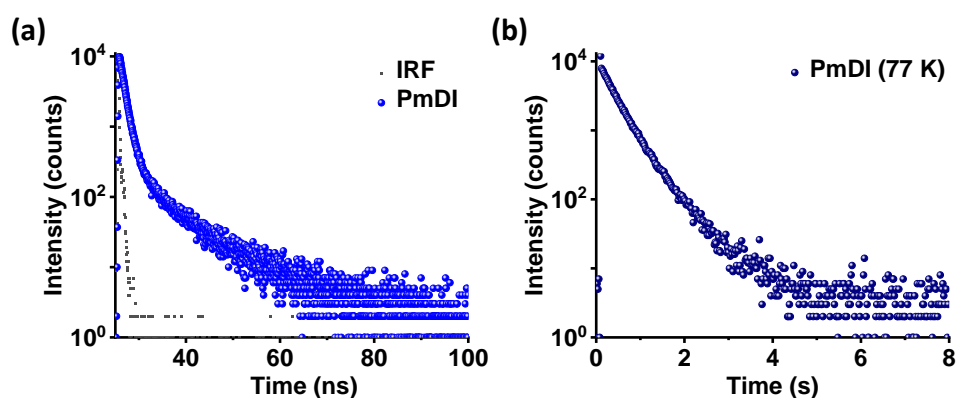

**Figure S1.** Lifetime decay profiles of **PmDI** ( $[c] = 10^{-5}$  M) in THF (a) at room temperature ( $\lambda_{\text{exc.}} = 375$  nm,  $\lambda_{\text{monitored}} = 450$  nm) and (b) at 77 K ( $\lambda_{\text{exc.}} = 340$  nm,  $\lambda_{\text{monitored}} = 550$  nm).

**Note:** **PmDI** at room temperature exhibited characteristic fluorescence with maximum at 434 nm and corresponding nanosecond lifetime of 2.17 ns in THF. Upon freezing to 77 K glassy matrix, a red-shifted band was observed at 500 nm with an average decay time of 0.4 s, suggesting it to be **PmDI** phosphorescence. At cryogenic conditions, the triplet state of **PmDI** gets activated because of reduced non-radiative vibrational relaxations.

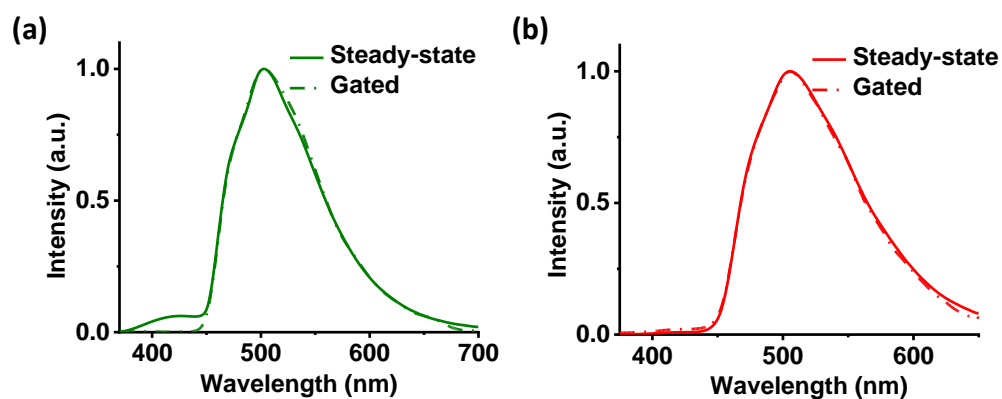

**Figure S2.** Steady-state and gated emission (1 ms delay) spectra of (a) **PmDI-TBB** (b) **PmDI-HBB**, which prove the presence of a delayed component ( $\lambda_{\text{exc.}} = 340$  nm).

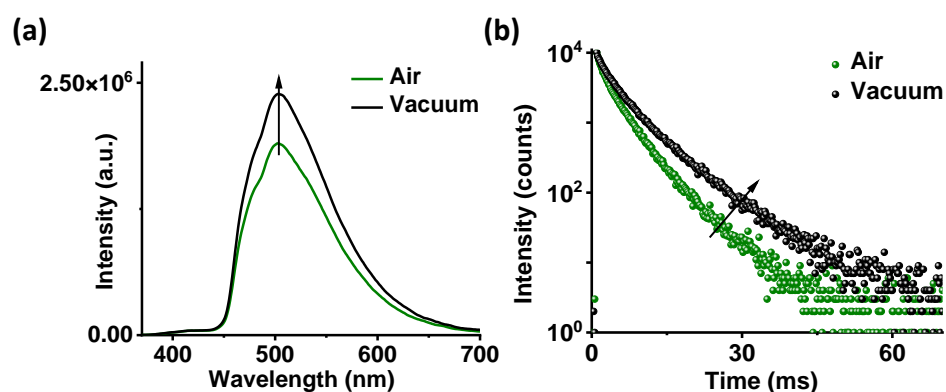

**Figure S3.** (a) Emission spectra of **PmDI-TBB** in the presence and in absence of air ( $\lambda_{\text{exc.}} = 340$  nm). (b) Lifetime decay profile of **PmDI-TBB** in the presence and in absence of air ( $\lambda_{\text{exc.}} = 340$  nm,  $\lambda_{\text{monitored}} = 550$  nm).

**Note:** Reduced emission intensity and lifetime in the presence of air (oxygen) suggested triplet contribution in the emission.

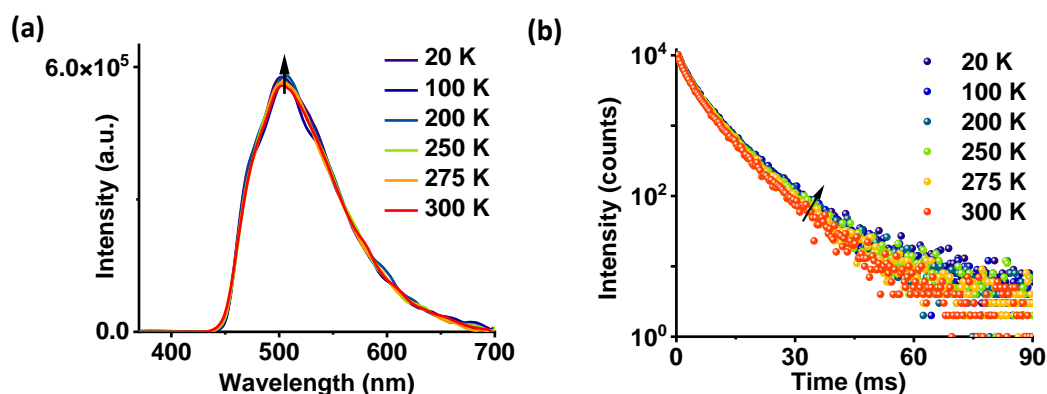

**Figure S4.** Temperature-dependent (a) gated emission spectra (1 ms delay;  $\lambda_{\text{exc.}} = 340$  nm) and (b) lifetime decay profiles ( $\lambda_{\text{exc.}} = 340$  nm,  $\lambda_{\text{monitored}} = 550$  nm) for **PmDI-TBB** cocrystal.

**Note:** Upon gradually lowering the temperature from 300 K to 20 K, the emission intensity and lifetime enhanced due to reduced thermal vibration that validated the nature of emission to be phosphorescence. However, the changes in emission and lifetime were not so significant at lower temperatures, which is assumed to be due to pre-existing constrained vibrational motion of the molecules within the cocrystal.

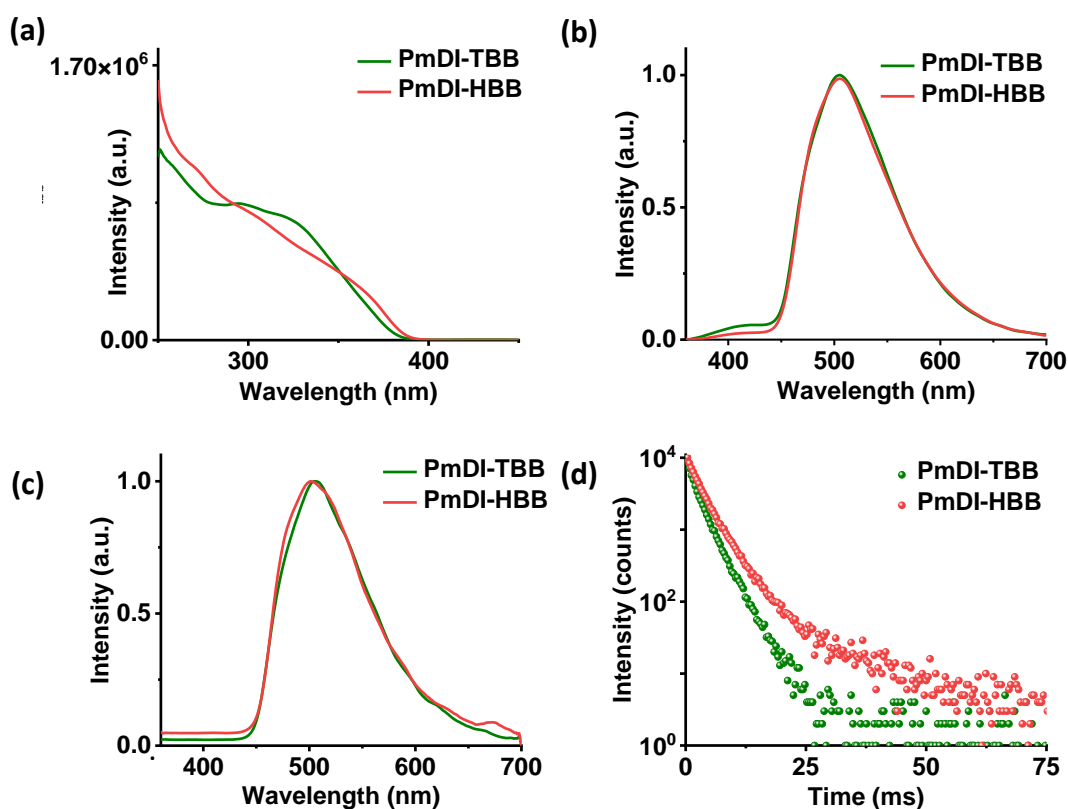

**Figure S5.** Neat-film studies for **PmDI-TBB** and **PmDI-HBB**: (a) excitation spectra ( $\lambda_{\text{monitored}} = 550 \text{ nm}$ ), (b) normalized steady-state emission spectra ( $\lambda_{\text{exc.}} = 340 \text{ nm}$ ). (c) Normalized gated emission spectra (1 ms delay time,  $\lambda_{\text{exc.}} = 340 \text{ nm}$ ), (d) lifetime decay profile ( $\lambda_{\text{exc.}} = 340 \text{ nm}$ ,  $\lambda_{\text{monitored}} = 550 \text{ nm}$ ).

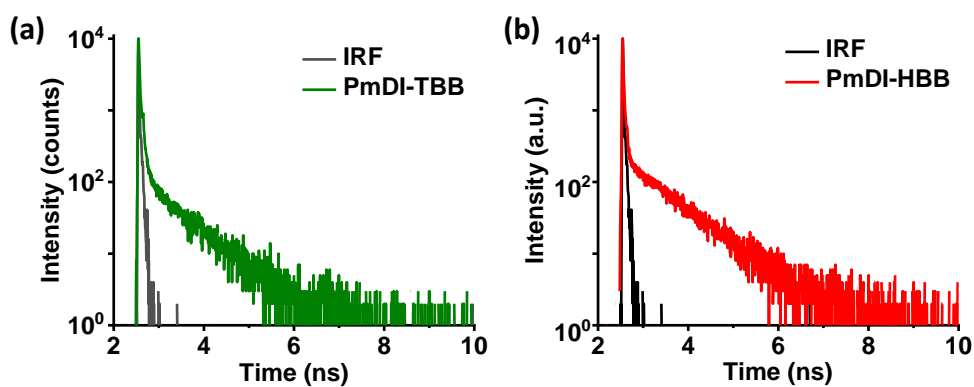

**Figure S6.** Fluorescence lifetime decay profiles of a) **PmDI-TBB**, and b) **PmDI-HBB** cocrystal ( $\lambda_{\text{exc.}} = 373 \text{ nm}$ ,  $\lambda_{\text{monitored}} = 420 \text{ nm}$ ).

|                    | $\lambda_{\text{exc.}}$ (nm) | $\lambda_{\text{collected}}$<br>(nm) | $\tau_1$          | $\tau_2$          | $\tau_3$           | $\langle\tau_{\text{avg.}}\rangle$ |
|--------------------|------------------------------|--------------------------------------|-------------------|-------------------|--------------------|------------------------------------|
| <b>PmDI (rt)</b>   | 375                          | 450                                  | 2.50 ns<br>(16 %) | 0.81 ns<br>(73 %) | 10.76 ns<br>(11 %) | 2.17 ns                            |
| <b>PmDI (77 K)</b> | 340                          | 550                                  | 0.31 s<br>(73 %)  | 0.66 s<br>(27 %)  | -                  | 0.40 s                             |

**Table S1.** Summary of **PmDI** lifetime decay in  $10^{-5}$  (M) THF solution at different temperatures.

|                             | $\lambda_{\text{exc.}}$<br>(nm) | $\lambda_{\text{collected}}$<br>(nm) | $\tau_1$<br>(ms)  | $\tau_2$<br>(ms)  | $\tau_3$<br>(ms)  | $\langle\tau_{\text{avg.}}\rangle$<br>(ms) |
|-----------------------------|---------------------------------|--------------------------------------|-------------------|-------------------|-------------------|--------------------------------------------|
| <b>PmDI-TBB</b><br>(air)    | 340                             | 550                                  | 1.76 ms<br>(36 %) | 5.22 ms<br>(64 %) | -                 | 3.97 ms                                    |
| <b>PmDI-TBB</b><br>(vacuum) | 340                             | 550                                  | 2.91 ms<br>(43 %) | 7.88 ms<br>(57 %) | -                 | 5.74 ms                                    |
| <b>PmDI-HBB</b><br>(air)    | 340                             | 550                                  | 1.26 ms<br>(14 %) | 3.17 ms<br>(78 %) | 8.41 ms<br>(8 %)  | 3.32 ms                                    |
| <b>PmDI-HBB</b><br>(vacuum) | 340                             | 550                                  | 1.64 ms<br>(29 %) | 3.68 ms<br>(69 %) | 17.21 ms<br>(2 %) | 3.35 ms                                    |

**Table S2.** Summary of phosphorescence decay for **PmDI-TBB** and **PmDI-HBB** cocrystals under air and vacuum at room temperature.

|                            | $\lambda_{exc.}$<br>(nm) | $\lambda_{collected}$<br>(nm) | $\tau_1$<br>(ms)  | $\tau_2$<br>(ms)  | $\tau_3$<br>(ms)  | $\langle \tau_{avg.} \rangle$<br>(ms) |
|----------------------------|--------------------------|-------------------------------|-------------------|-------------------|-------------------|---------------------------------------|
| <b>PmDI-TBB</b><br>(20 K)  | 340                      | 550                           | 2.85 ms<br>(28 %) | 7.73 ms<br>(67 %) | 25.93 ms<br>(5 %) | 7.27 ms                               |
| <b>PmDI-TBB</b><br>(300 K) | 340                      | 550                           | 2.86 ms<br>(45 %) | 8.26 ms<br>(55 %) | -                 | 5.83 ms                               |
| <b>PmDI-HBB</b><br>(20 K)  | 340                      | 550                           | 3.99 ms<br>(95 %) | 33.32 ms<br>(5 %) | -                 | 5.45 ms                               |
| <b>PmDI-HBB</b><br>(300 K) | 340                      | 550                           | 2.35 ms<br>(68 %) | 5.32 ms<br>(32 %) | -                 | 3.30 ms                               |

**Table S3.** Summary of phosphorescence decay of **PmDI-TBB** and **PmDI-HBB** cocrystals at different temperatures.

| Cocrystal       | $k_{p^r}(s^{-1})$ | $k_{nr}(s^{-1})$ | $k_{ISC}(s^{-1})$  |
|-----------------|-------------------|------------------|--------------------|
| <b>PmDI-TBB</b> | 136.02            | 115.86           | $7.71 \times 10^8$ |
| <b>PmDI-HBB</b> | 126.50            | 174.69           | $1.58 \times 10^8$ |

$$k_{p^r}(s^{-1}) = \Phi_P / \langle \tau \rangle_P; k_{nr} = (1 - \Phi_P) / \langle \tau \rangle_P; k_{ISC} = \Phi_P / \langle \tau \rangle_F$$

**Table S4.** Summary  $k_{p^r}(s^{-1})$ ,  $k_{ISC}(s^{-1})$ , and  $k_{nr}(s^{-1})$  of **PmDI-TBB** and **PmDI-HBB**.



| Co-crystals                                                                         | Phosphorescence QY<br>(Types of crystal) | References |
|-------------------------------------------------------------------------------------|------------------------------------------|------------|
| 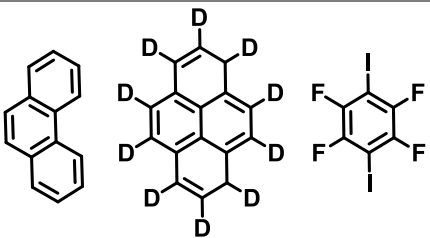   | 26 %<br>(Cocrystal)                      | S2         |
|    | 25 %<br>(Cocrystal)                      | S3         |
|   | 33 %<br>(Cocrystal)                      | S4         |
|  | 24 %<br>(Cocrystal)                      | S5         |
|  | 55 %<br>(Doped crystal)                  | S6         |
|  | 62 %<br>(Doped crystal)                  | S7         |
|  | 54 %<br>(Cocrystal)                      | This work  |

**Table S5.** Summary of existing reported highly efficient cocrystal phosphorescence QY in comparison with this work.

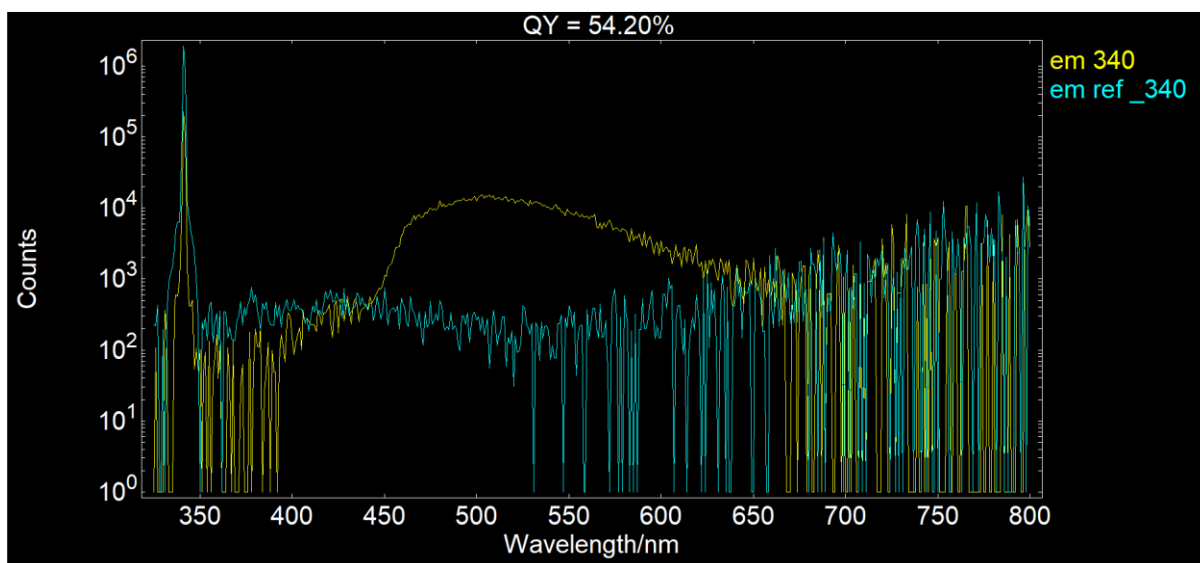

Figure S7. Screenshot of phosphorescence quantum yield for **PmDI-TBB** cocystal.

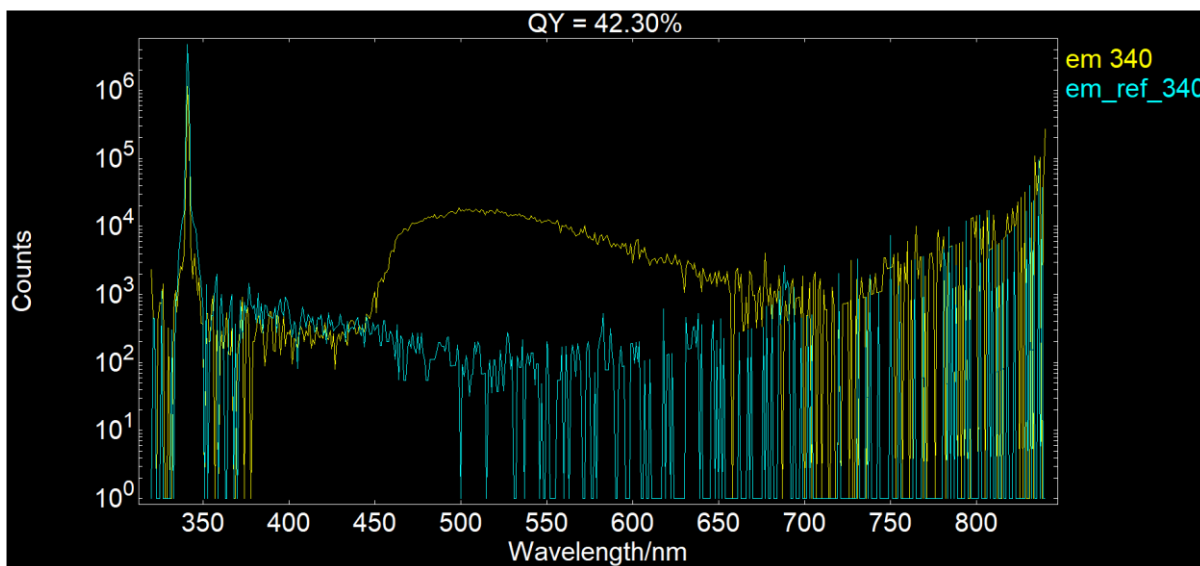

Figure S8. Screenshot of phosphorescence quantum yield for **PmDI-HBB** cocystal.

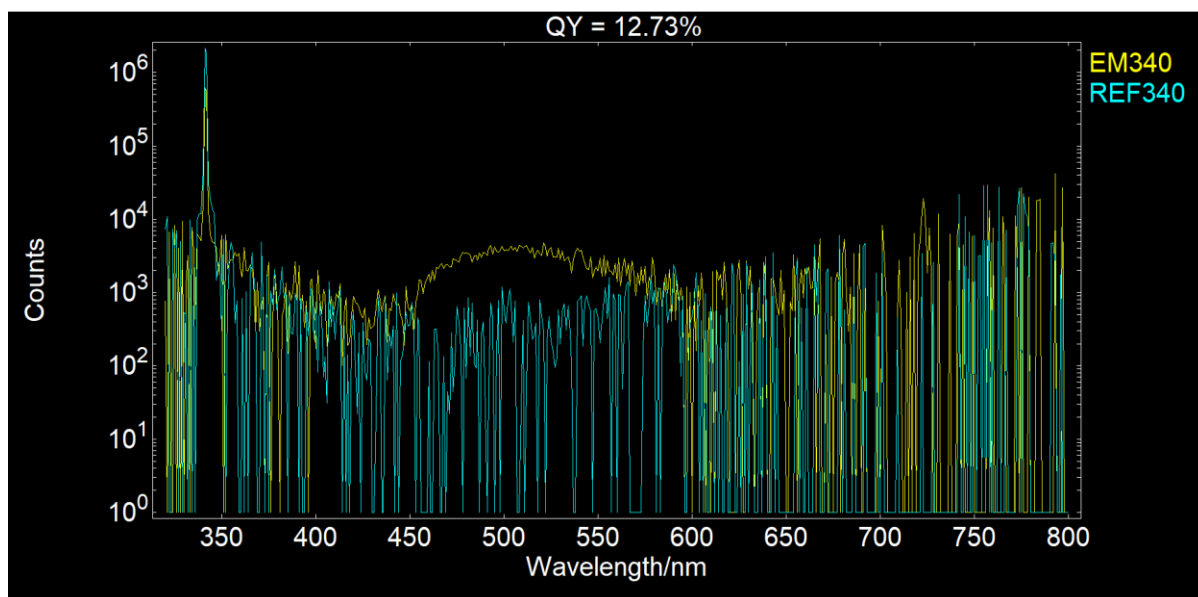

Figure S9. Screenshot of phosphorescence quantum yield for PmDI-TBB neat film.

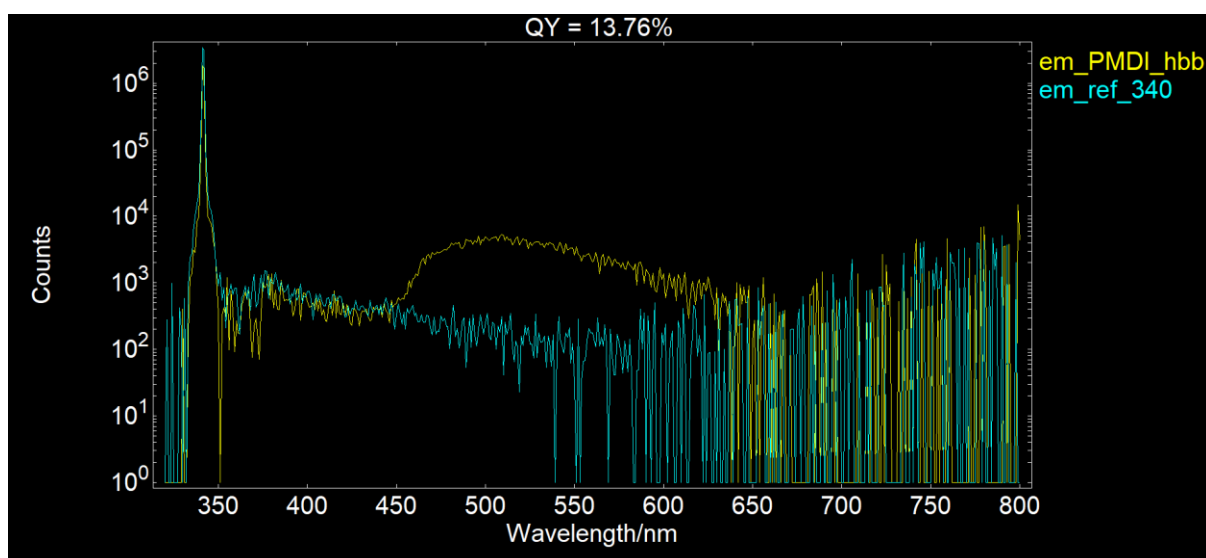

Figure S10. Screenshot of phosphorescence quantum yield for PmDI-HBB neat film.



---

The following ALERTS were generated. Each ALERT has the format  
**test-name\_ALERT\_alert-type\_alert-level.**  
Click on the hyperlinks for more details of the test.

---

● **Alert level B**

PLAT431\_ALERT\_2\_B Short Inter HL..A Contact Br01 ..01 . 3.05 Ang.  
2-x,1-y,1-z = 2\_766 Check  
PLAT431\_ALERT\_2\_B Short Inter HL..A Contact Br02 ..02 . 3.02 Ang.  
x,y,z = 1\_555 Check

---

● **Alert level C**

PLAT193\_ALERT\_1\_C Cell and Diffraction Temperatures Differ by .... 2 Degree  
PLAT218\_ALERT\_3\_C Constrained U(1,j) Components(s) for Br02 6 Check  
PLAT218\_ALERT\_3\_C Constrained U(1,j) Components(s) for O2 6 Check  
PLAT767\_ALERT\_4\_C INS Embedded LIST 6 Instruction Should be LIST 4 Please Check

---

● **Alert level G**

PLAT045\_ALERT\_1\_G Calculated and Reported Z Differ by a Factor ... 0.125 Check  
PLAT154\_ALERT\_1\_G The s.u.'s on the Cell Angles are Equal ..(Note) 0.003 Degree  
PLAT720\_ALERT\_4\_G Number of Unusual/Non-Standard Labels ..... 3 Note  
Br01 Br02 Br03  
PLAT883\_ALERT\_1\_G No Info/Value for \_atom\_sites\_solution\_primary . Please Do !  
PLAT909\_ALERT\_3\_G Percentage of I>2sig(I) Data at Theta(Max) Still 78% Note  
PLAT910\_ALERT\_3\_G Missing # of FCF Reflection(s) Below Theta(Min). 2 Note  
0 1 0, 0 0 1,  
PLAT913\_ALERT\_3\_G Missing # of Very Strong Reflections in FCF .... 1 Note  
-1 2 0,  
PLAT933\_ALERT\_2\_G Number of HKL-OMIT Records in Embedded .res File 1 Note  
0 1 0,  
PLAT965\_ALERT\_2\_G The SHELXL WEIGHT Optimisation has not Converged Please Check  
PLAT967\_ALERT\_5\_G Note: Two-Theta Cutoff Value in Embedded .res .. 50.0 Degree  
PLAT969\_ALERT\_5\_G The 'Henn et al.' R-Factor-gap value ..... 2.123 Note  
Predicted wR2: Based on SigI\*\*2 2.85 or SHELX Weight 6.29  
PLAT978\_ALERT\_2\_G Number C-C Bonds with Positive Residual Density. 6 Info

---

0 **ALERT level A** = Most likely a serious problem - resolve or explain  
2 **ALERT level B** = A potentially serious problem, consider carefully  
4 **ALERT level C** = Check. Ensure it is not caused by an omission or oversight  
12 **ALERT level G** = General information/check it is not something unexpected

4 ALERT type 1 CIF construction/syntax error, inconsistent or missing data  
5 ALERT type 2 Indicator that the structure model may be wrong or deficient  
5 ALERT type 3 Indicator that the structure quality may be low  
2 ALERT type 4 Improvement, methodology, query or suggestion  
2 ALERT type 5 Informative message, check

---

It is advisable to attempt to resolve as many as possible of the alerts in all categories. Often the minor alerts point to easily fixed oversights, errors and omissions in your CIF or refinement strategy, so attention to these fine details can be worthwhile. In order to resolve some of the more serious problems it may be necessary to carry out additional measurements or structure refinements. However, the purpose of your study may justify the reported deviations and the more serious of these should normally be commented upon in the discussion or experimental section of a paper or in the "special\_details" fields of the CIF. checkCIF was carefully designed to identify outliers and unusual parameters, but every test has its limitations and alerts that are not important in a particular case may appear. Conversely, the absence of alerts does not guarantee there are no aspects of the results needing attention. It is up to the individual to critically assess their own results and, if necessary, seek expert advice.

### Publication of your CIF in IUCr journals

A basic structural check has been run on your CIF. These basic checks will be run on all CIFs submitted for publication in IUCr journals (*Acta Crystallographica*, *Journal of Applied Crystallography*, *Journal of Synchrotron Radiation*); however, if you intend to submit to *Acta Crystallographica Section C* or *E* or *IUCrData*, you should make sure that **full publication checks** are run on the final version of your CIF prior to submission.

### Publication of your CIF in other journals

Please refer to the *Notes for Authors* of the relevant journal for any special instructions relating to CIF submission.

---

PLATON version of 15/07/2024; check.def file version of 15/07/2024

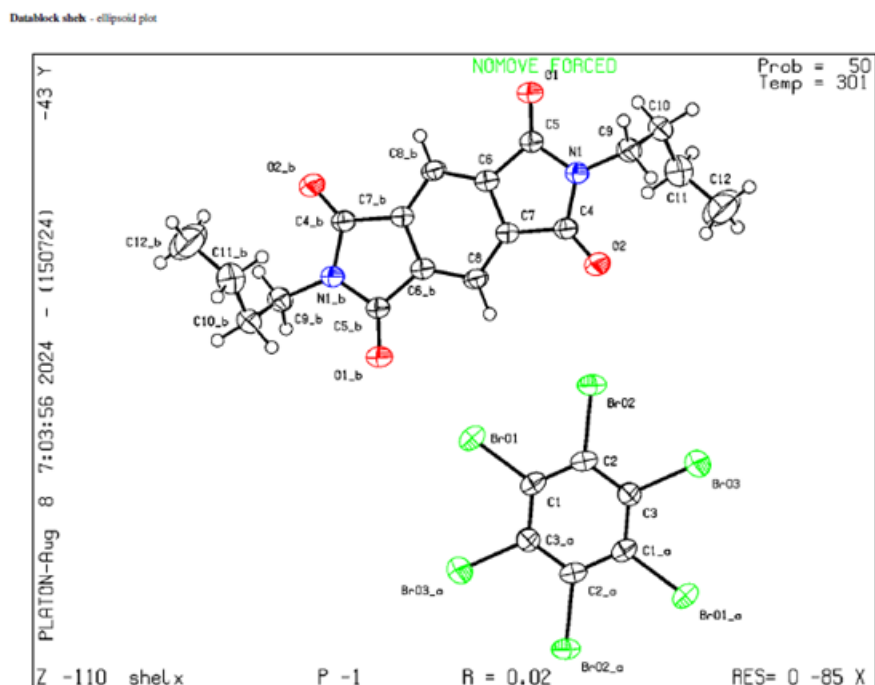

Figure S11. Check CIF documents for PmDI-HBB cocrystal.

## checkCIF/PLATON report

Structure factors have been supplied for datablock(s) shelx

THIS REPORT IS FOR GUIDANCE ONLY. IF USED AS PART OF A REVIEW PROCEDURE FOR PUBLICATION, IT SHOULD NOT REPLACE THE EXPERTISE OF AN EXPERIENCED CRYSTALLOGRAPHIC REFEREE.

No syntax errors found. CIF dictionary Interpreting this report

### Datablock: shelx

---

Bond precision: C-C = 0.0085 A Wavelength=0.71073

Cell: a=5.2047 (3) b=10.9093 (8) c=12.5548 (9)  
alpha=71.087 (3) beta=81.499 (3) gamma=86.355 (3)  
Temperature: 214 K

|                | Calculated               | Reported                    |
|----------------|--------------------------|-----------------------------|
| Volume         | 666.87 (8)               | 666.87 (8)                  |
| Space group    | P -1                     | P -1                        |
| Hall group     | -P 1                     | -P 1                        |
| Moiety formula | C18 H20 N2 O4, C6 H2 Br4 | ?                           |
| Sum formula    | C24 H22 Br4 N2 O4        | C3 H2.75 Br0.50 N0.25 O0.50 |
| Mr             | 722.04                   | 90.26                       |
| Dx, g cm-3     | 1.798                    | 1.798                       |
| Z              | 1                        | 8                           |
| Mu (mm-1)      | 6.067                    | 6.067                       |
| F000           | 352.0                    | 352.0                       |
| F000'          | 351.05                   |                             |
| h, k, lmax     | 6, 12, 14                | 6, 12, 14                   |
| Nref           | 2337                     | 2328                        |
| Tmin, Tmax     | 0.804, 0.886             | 0.518, 0.746                |
| Tmin'          | 0.483                    |                             |

Correction method= # Reported T Limits: Tmin=0.518 Tmax=0.746  
AbsCorr = MULTI-SCAN

Data completeness= 0.996 Theta(max)= 25.000

R(reflections)= 0.0342 ( 2068) wR2(reflections)=  
0.1061 ( 2328)  
S = 1.088 Npar= 137

The following ALERTS were generated. Each ALERT has the format  
**test-name\_ALERT\_alert-type\_alert-level.**  
Click on the hyperlinks for more details of the test.

---

● **Alert level B**

|                   |                                                |       |        |
|-------------------|------------------------------------------------|-------|--------|
| PLAT201_ALERT_2_B | Isotropic non-H Atoms in Main Residue(s) ..... | 2     | Report |
|                   | C11 C12                                        |       |        |
| PLAT220_ALERT_2_B | NonSolvent Resd 1 C Ueq(max)/Ueq(min) Range    | 7.2   | Ratio  |
| PLAT431_ALERT_2_B | Short Inter HL..A Contact Br01 ..01 .          | 3.02  | Ang.   |
|                   | x,y,z =                                        | 1_555 | Check  |
| PLAT431_ALERT_2_B | Short Inter HL..A Contact Br02 ..02 .          | 3.03  | Ang.   |
|                   | 2-x,1-y,1-z =                                  | 2_766 | Check  |

---

● **Alert level C**

|                   |                                                  |         |              |
|-------------------|--------------------------------------------------|---------|--------------|
| PLAT218_ALERT_3_C | Constrained U(1,j) Components(s) for C10         | 6       | Check        |
| PLAT222_ALERT_3_C | NonSolvent Resd 1 H Uiso(max)/Uiso(min) Range    | 8.6     | Ratio        |
| PLAT241_ALERT_2_C | High 'MainMol' Ueq as Compared to Neighbors of   | C10     | Check        |
| PLAT242_ALERT_2_C | Low 'MainMol' Ueq as Compared to Neighbors of    | C9      | Check        |
| PLAT242_ALERT_2_C | Low 'MainMol' Ueq as Compared to Neighbors of    | C11     | Check        |
| PLAT341_ALERT_3_C | Low Bond Precision on C-C Bonds .....            | 0.00855 | Ang.         |
| PLAT360_ALERT_2_C | Short C(sp3)-C(sp3) Bond C10 - C11 .             | 1.35    | Ang.         |
| PLAT360_ALERT_2_C | Short C(sp3)-C(sp3) Bond C11 - C12 .             | 1.41    | Ang.         |
| PLAT767_ALERT_4_C | INS Embedded LIST 6 Instruction Should be LIST 4 |         | Please Check |
| PLAT911_ALERT_3_C | Missing FCF Refl Between Thmin & STh/L= 0.595    | 7       | Report       |
|                   | -1 2 0, 0 3 0, 1 -2 1, 1 1 1, 0 3 1, 1 3 1,      |         |              |
|                   | 0 0 3,                                           |         |              |
| PLAT913_ALERT_3_C | Missing # of Very Strong Reflections in FCF .... | 4       | Note         |
|                   | -1 2 0, 1 -2 1, 1 1 1, 0 0 3,                    |         |              |
| PLAT918_ALERT_3_C | Reflection(s) with I(obs) much Smaller I(calc) . | 1       | Check        |
| PLAT977_ALERT_2_C | Check Negative Difference Density on H10B .      | -0.32   | eA-3         |

---

● **Alert level G**

|                   |                                                      |       |             |
|-------------------|------------------------------------------------------|-------|-------------|
| PLAT045_ALERT_1_G | Calculated and Reported Z Differ by a Factor ...     | 0.125 | Check       |
| PLAT154_ALERT_1_G | The s.u.'s on the Cell Angles are Equal ..(Note)     | 0.003 | Degree      |
| PLAT720_ALERT_4_G | Number of Unusual/Non-Standard Labels .....          | 2     | Note        |
|                   | Br01 Br02                                            |       |             |
| PLAT883_ALERT_1_G | No Info/Value for _atom_sites_solution_primary .     |       | Please Do ! |
| PLAT909_ALERT_3_G | Percentage of I>2sig(I) Data at Theta(Max) Still     | 71%   | Note        |
| PLAT910_ALERT_3_G | Missing # of FCF Reflection(s) Below Theta(Min).     | 2     | Note        |
|                   | 0 1 0, 0 0 1,                                        |       |             |
| PLAT933_ALERT_2_G | Number of HKL-OMIT Records in Embedded .res File     | 1     | Note        |
|                   | 0 1 0,                                               |       |             |
| PLAT967_ALERT_5_G | Note: Two-Theta Cutoff Value in Embedded .res ..     | 50.0  | Degree      |
| PLAT969_ALERT_5_G | The 'Henn et al.' R-Factor-gap value .....           | 4.852 | Note        |
|                   | Predicted wR2: Based on SigI**2 2.19 or SHELX Weight | 9.76  |             |
| PLAT978_ALERT_2_G | Number C-C Bonds with Positive Residual Density.     | 3     | Info        |

---

0 **ALERT level A** = Most likely a serious problem - resolve or explain  
4 **ALERT level B** = A potentially serious problem, consider carefully  
13 **ALERT level C** = Check. Ensure it is not caused by an omission or oversight  
10 **ALERT level G** = General information/check it is not something unexpected



3 ALERT type 1 CIF construction/syntax error, inconsistent or missing data  
12 ALERT type 2 Indicator that the structure model may be wrong or deficient  
8 ALERT type 3 Indicator that the structure quality may be low  
2 ALERT type 4 Improvement, methodology, query or suggestion  
2 ALERT type 5 Informative message, check

It is advisable to attempt to resolve as many as possible of the alerts in all categories. Often the minor alerts point to easily fixed oversights, errors and omissions in your CIF or refinement strategy, so attention to these fine details can be worthwhile. In order to resolve some of the more serious problems it may be necessary to carry out additional measurements or structure refinements. However, the purpose of your study may justify the reported deviations and the more serious of these should normally be commented upon in the discussion or experimental section of a paper or in the "special\_details" fields of the CIF. checkCIF was carefully designed to identify outliers and unusual parameters, but every test has its limitations and alerts that are not important in a particular case may appear. Conversely, the absence of alerts does not guarantee there are no aspects of the results needing attention. It is up to the individual to critically assess their own results and, if necessary, seek expert advice.

#### Publication of your CIF in IUCr journals

A basic structural check has been run on your CIF. These basic checks will be run on all CIFs submitted for publication in IUCr journals (*Acta Crystallographica*, *Journal of Applied Crystallography*, *Journal of Synchrotron Radiation*); however, if you intend to submit to *Acta Crystallographica Section C* or *E* or *IUCrData*, you should make sure that **full publication checks** are run on the final version of your CIF prior to submission.

#### Publication of your CIF in other journals

Please refer to the *Notes for Authors* of the relevant journal for any special instructions relating to CIF submission.

PLATON version of 15/07/2024; check.def file version of 15/07/2024

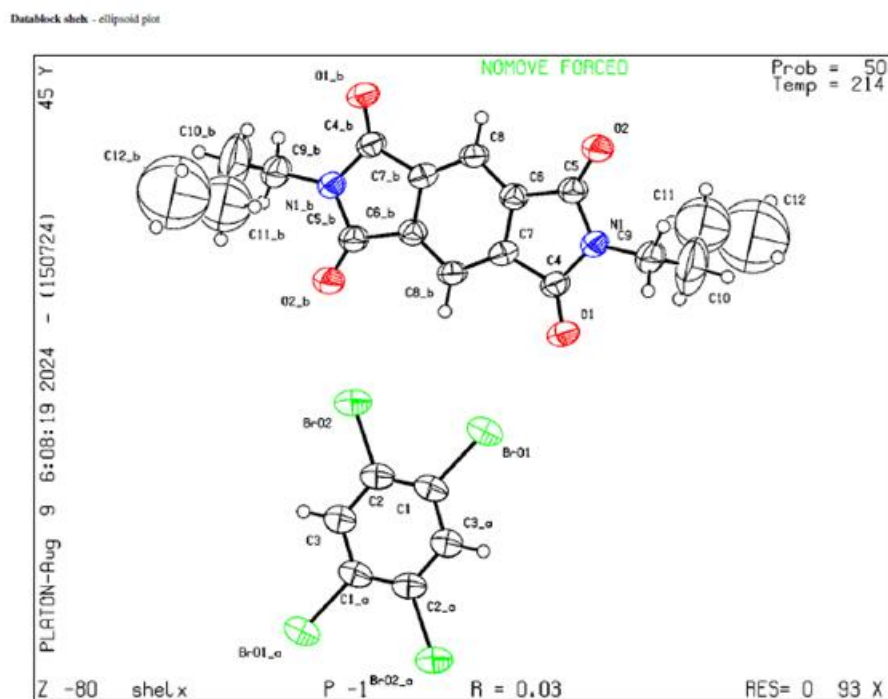

Figure S12. Check CIF documents for PmDI-TBB cocrystal.

### Supporting Characterization Original data:

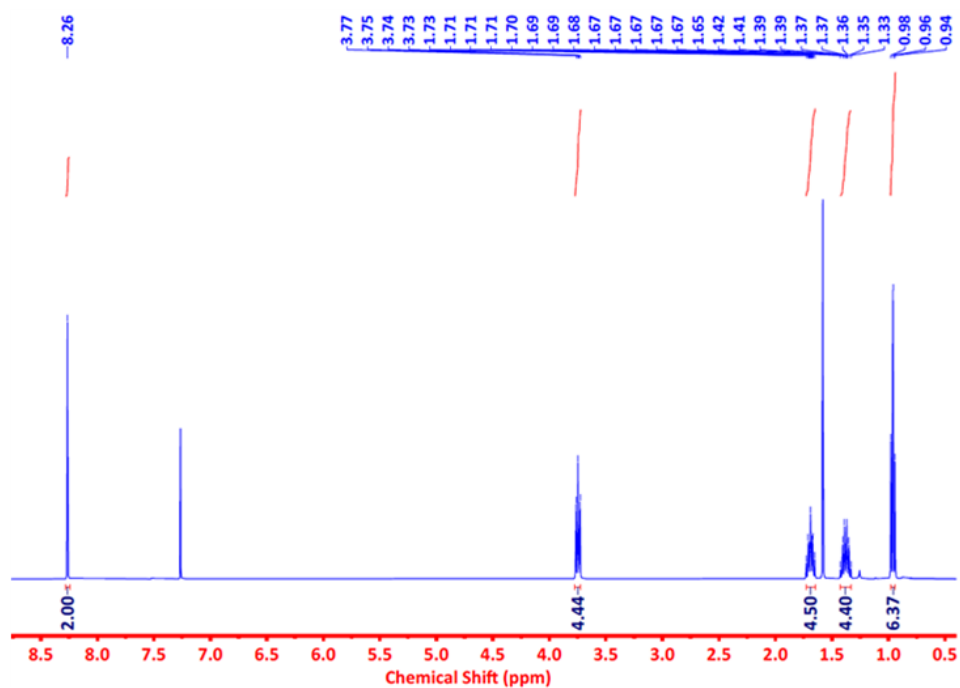

Figure S13.  $^1\text{H}$  NMR spectrum of **PmDI** in  $\text{CDCl}_3$ .

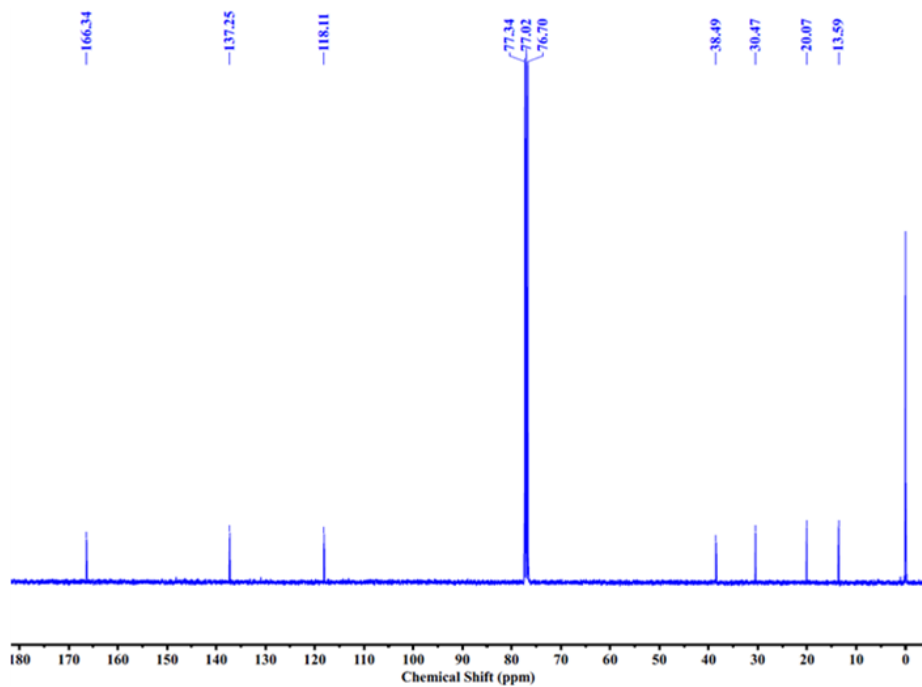

Figure S14.  $^{13}\text{C}$  NMR spectrum of **PmDI** in  $\text{CDCl}_3$ .

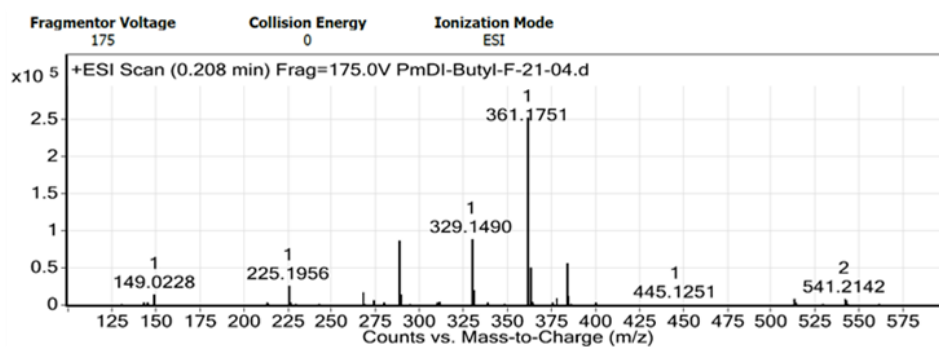

**Figure S15.** ESI-HRMS spectrum of **PmDI**.

## References:

- [S1] S. Kuila, S. Garain, G. Banappanavar, B C. Garain, D. Kabra, S. K. Pati and S. J. George, *J. Phys. Chem. B*, 2021, **125**, 17, 4520.
- [S2] A. Abe, K. Goushi, M. Mamada and C. Adachi, *Adv. Mater*, 2023, 2211160.
- [S3] M. Sun, O. Anhalt, M. B. Sárosi, M. Stolte and F. Würthner, *Adv. Mater.* 2022, **34**, 2207331.
- [S4] H. Y. Gao, Q. J. Shen, X. R. Zhao, X. Q. Yan, X. Pang and W. J. Jin, *Journal of Materials Chemistry*. 2012, **22**, 5336-5343.
- [S5] L. Bian, H. Shi, X. Wang, K. Ling, H. Ma, M. Li, Z. Cheng, C. Ma, S. Cai, Q. Wu, N. Gan, X. Xu, Z. An and W. Huang, *J. Am. Chem. Soc.* 2018, **140**, 10734-10739.
- [S6] O. Bolton, K. Lee, J. H. Kim, K. Y. Lin and J. Kim, *Nat. Chem.*, 2011, **3**, 205.
- [S7] L. Xiao, Y. Wu, J. Chen, Z. Yu, Y. Liu, J. Yao and H. Fu, *J. Phys. Chem. A*, 2017, **121**, 8652.
